# Supplementary material
Source: PubMed Central journal article supplement (PMC4961589)
Supplement: NIHMS795487-supplement-ds.pdf [file NIHMS795487-supplement-ds.pdf]

SUPPLEMENTAL MATERIAL

**Table I.** Demographic, Clinical, and Operative Characteristics by presence of watershed and embolic infarct on diffusion weighted MRI

| <b>Clinical characteristics and demographics:</b> | Overall (n=129) | Embolic infarct (n= 77) | No embolic infarct (n=52) | <i>P</i> value | OR (95% CI)    | Watershed infarct (n= 19) | No watershed infarct (n=110) | <i>P</i> value | OR (95% CI)   |
|---------------------------------------------------|-----------------|-------------------------|---------------------------|----------------|----------------|---------------------------|------------------------------|----------------|---------------|
| Age (years)                                       | 75 (70-80)      | 75 (70-79)              | 76 (70-80)                | 0.84           | 1.0 (0.9-1.1)  | 77 (70-81)                | 75 (70-80)                   | 0.42           | 1.0 (0.9-1.2) |
| Female                                            | 43 (33.6)       | 27 (35.1)               | 16 (31.4)                 | 0.67           | 1.2 (0.6-2.5)  | 6 (31.6)                  | 37 (34)                      | 0.84           | 0.9 (0.1-2.6) |
| Non-white                                         | 9 (7.0)         | 4 (5.2)                 | 5 (9.6)                   | 0.33           | 1.3 (0.7-2.8)  | 2 (10.5)                  | 7 (6.4)                      | 0.51           | 0.7 (0.3-1.7) |
| Body mass index                                   | 29 (26-32)      | 29 (27-33)              | 28 (26-33)                | 0.14           | 1.0 (0.9-1.1)  | 29 (26-32)                | 29 (26-33)                   | 0.66           | 0.9 (0.9-1.1) |
| Current smoker                                    | 4 (3.1)         | 1 (1.3)                 | 3 (5.8)                   | 0.15           | 0.2 (0.02-2.0) | 1 (5.3)                   | 3 (2.7)                      | 0.56           | 2.0 (0.2-20)  |
| COPD                                              | 11 (8.5)        | 5 (6.5)                 | 6 (11.5)                  | 0.31           | 0.5 (0.2-1.9)  | 0                         | 11 (10)                      | 0.15           |               |
| Hypertension                                      | 110 (85.3)      | 65 (84.4)               | 45 (86.5)                 | 0.74           | 0.8 (0.3-2.3)  | 17 (89.5)                 | 93 (84.6)                    | 0.58           | 1.6 (0.3-7.3) |
| Diabetes                                          | 42 (32.6)       | 26 (33.8)               | 16 (30.8)                 | 0.72           | 1.2 (0.5-2.4)  | 7 (36.8)                  | 35 (31.8)                    | 0.67           | 1.3 (0.5-3.4) |
| Hyperlipidemia                                    | 113 (87.6)      | 66 (85.7)               | 47 (90.4)                 | 0.43           | 0.64 (0.2-2.0) | 18 (94.7)                 | 95 (86.4)                    | 0.31           | 2.8 (0.4-22)  |
| Peripheral vascular disease                       | 11 (8.5)        | 7 (9.1)                 | 4 (7.7)                   | 0.78           | 1.2 (0.3-4.3)  | 1 (5.3)                   | 10 (9.1)                     | 0.58           | 0.6 (0.1-4.6) |
| Chronic Renal Failure                             | 5 (3.9)         | 3 (3.9)                 | 2 (3.9)                   | 0.99           | 1.0 (0.2-6.2)  | 0                         | 5 (4.6)                      | 0.99           |               |
| Atrial fibrillation                               | 43 (33.3)       | 21 (27.3)               | 22 (42.3)                 | 0.08           | 0.5 (0.2-1.1)  | 7 (36.8)                  | 36 (32.7)                    | 0.73           | 1.2 (0.4-3.3) |
| Prior stroke or TIA                               | 12 (9.3)        | 7 (9.1)                 | 5 (9.6)                   | 0.92           | 0.9 (0.3-3.1)  | 1 (5.26)                  | 11 (10)                      | 0.51           | 0.5 (0.6-4.1) |
| Coronary artery disease                           | 83 (64)         | 48(62)                  | 35(67)                    | 0.6            | 0.8 (0.4-1.7)  | 11(58)                    | 72 (65)                      | 0.5            | 0.7 (0.3-2.0) |

|                                                       |               |               |               |       |                |              |               |      |               |
|-------------------------------------------------------|---------------|---------------|---------------|-------|----------------|--------------|---------------|------|---------------|
| Prior PTCA or CABG                                    | 27 (21)       | 12 (15.6)     | 15 (28.9)     | 0.07  | 0.5 (0.2-1.1)  | 2 (11)       | 25 (23)       | 0.36 | 0.4 (0.9-1.9) |
| Congestive heart failure                              | 31 (24.0)     | 15 (19.5)     | 16 (30.8)     | 0.14  | 0.5 (0.2-1.2)  | 5 (26.3)     | 26 (23.6)     | 0.8  | 1.2 (0.4-3.5) |
| Left ventricular ejection fraction                    | 60 (55-65)    | 60 (55-65)    | 60 (54-64)    | 0.19  | 1.0 (0.9-1.1)  | 65 (60-69)   | 60 (55-65)    | 0.02 | 1.1 (1.0-1.1) |
| Mean aortic valve gradient (n=188)                    | 44 (36-54)    | 47 (42-56)    | 40 (30-53)    | 0.005 | 1.0 (1.0-1.1)  | 49 (44-54)   | 44 (34-54)    | 0.12 | 1.0 (0.9-1.1) |
| Internal carotid artery stenosis >70%*                | 6/98 (6.1)    | 5/98 (8.2)    | 1/98 (2.7)    | 0.27  | 3.2 (0.4-28.6) | 3/98 (21.4)  | 3/98 (3.6)    | 0.01 | 7.3 (1.3-41)  |
| Old infarct subcortical                               | 113 (88.3)    | 73 (94.8)     | 40 (78.4)     | 0.01  | 5.0 (1.5-16)   | 17 (89.5)    | 96 (88.1)     | 0.86 | 1.2 (0.2-5.6) |
| Old infarct cortical                                  | 12 (9.4)      | 10 (13)       | 2 (3.9)       | 0.12  | 3.7 (0.8-17)   | 1 (5.3)      | 11 (10.1)     | 0.51 | 0.5 (0.6-4.1) |
| <b>Operative characteristics:</b>                     |               |               |               |       |                |              |               |      |               |
| Mod-Severe proximal ascending aortic atherosclerosis† | 30/102 (29.4) | 20/102 (32.8) | 10/102 (24.4) | 0.36  | 1.5 (0.6-3.7)  | 4/102 (26.7) | 26/102 (29.9) | 0.8  | 0.9 (0.2-2.9) |
| Mod-Severe middle ascending aortic atherosclerosis†   | 22/102 (21.6) | 18/102 (28.6) | 4/102 (10.3)  | 0.03  | 3.5 (1.1-11.3) | 2/102 (13.3) | 20/102 (23)   | 0.4  | 0.5 (0.1-2.5) |
| Mod-Severe distal ascending aortic atherosclerosis†   | 19/96 (19.8)  | 13/96 (22)    | 6 (16.2)      | 0.49  | 1.5 (0.5-4.3)  | 3/96 (20)    | 16/96 (19.8)  | 0.98 | 1.0 (0.3-4.0) |
| CPB time (minutes)                                    | 103 (83-136)  | 101 (80-138)  | 106 (87-131)  | 0.4   | 1.0 (0.99-1.0) | 95 (74-144)  | 104 (84-136)  | 0.48 | 0.9 (0.9-1.0) |
| Concomitant MVR                                       | 12 (9.3)      | 5 (6.5)       | 7 (13.5)      | 0.18  | 0.4 (0.1-1.5)  | 1 (5.3)      | 11 (10)       | 0.51 | 0.5 (0.6-4.1) |
| Concomitant CABG                                      | 36 (27.9)     | 22 (28.6)     | 14 (27)       | 0.84  | 1.0 (0.5-2.4)  | 4 (21.1)     | 32 (29.1)     | 0.47 | 0.7 (0.2-2.1) |
| Lowest hemoglobin                                     | 8.1 (7.3-8.8) | 8.2 (7.1-8.8) | 8 (7.5-8.7)   | 0.43  | 0.9 (0.7-1.2)  | 8.1 (7-8.8)  | 8.2 (7.4-8.8) | 0.42 | 0.8 (0.6-1.2) |

|                                    |            |            |            |      |               |            |            |      |               |
|------------------------------------|------------|------------|------------|------|---------------|------------|------------|------|---------------|
| MAP drop‡                          | 37 (30-48) | 37 (28-48) | 37 (31-49) | 0.84 | 1.0 (0.9-1.0) | 34 (28-43) | 38 (31-49) | 0.36 | 0.9 (0.9-1.0) |
| Post-operative atrial fibrillation | 85 (66.4)  | 48 (62.3)  | 37 (72.6)  | 0.23 | 0.6 (0.3-1.4) | 15 (79)    | 70 (64.2)  | 0.2  | 2.1 (0.6-6.7) |

All continuous variables reported as median (interquartile range) or n (%). COPD indicates chronic obstructive pulmonary disease; PTCA, percutaneous transluminal coronary angioplasty; CABG, coronary artery bypass graft; CPB, cardiopulmonary bypass; MVR, mitral valve replacement; MAP, mean arterial pressure.

All patient clinical history was defined by patient report or prior chart documentation

\*Doppler ultrasound

†Intraoperative epiaortic ultrasound (moderate atherosclerosis = 3-5mm calcification, and severe atherosclerosis = >5mm calcification)

‡Baseline MAP to lowest recorded MAP during procedure
